# Supplementary material
Source: MDPI journal article supplement (https://www.mdpi.com/search?q=metabolites-09-00168)
Supplement: s001 [file metabolites-09-00168-s001.pdf]

## NMR based metabolomic analysis of genetic and regionality on health promoting phytochemicals in lentil

Simone Rochfort <sup>1,2\*</sup>, Simone Vassiliadis <sup>1</sup>, Pankaj Maharjan <sup>3</sup> Jason Brand <sup>3</sup> and Joe Panozzo <sup>3</sup>

<sup>1</sup> Agriculture Research Victoria, 5 Ring Road, La Trobe University, Bundoora VIC 3083, Australia;

<sup>2</sup> School of Applied Systems Biology, La Trobe University, Bundoora VIC 3083, Australia;

<sup>3</sup> Agriculture Research Victoria, 110 Natimuk Road, Horsham VIC 3400, Australia;

\* Correspondence: [simone.rochfort@ecodev.vic.gov.au](mailto:simone.rochfort@ecodev.vic.gov.au);

**Supplementary Table 1.** Seed characteristics of 14 lentil genotypes.

| <b>Cultivar/genotype</b> | <b>Market grade</b> | <b>Seed phenotype</b> | <b>Seed coat colour phenotype</b> | <b>Cotyledon colour phenotype</b> | <b>Intended end use</b> |
|--------------------------|---------------------|-----------------------|-----------------------------------|-----------------------------------|-------------------------|
| PBA Giant                | Large green         | Plump lens            | Light green                       | Yellow-green                      | Not split               |
| PBA Greenfield           | Medium green        | Lens                  | Light green                       | Yellow-green                      | Split                   |
| PBA HurricaneXT          | Small red           | Plump-round           | Grey                              | Red-orange                        | Split                   |
| PBA Jumbo2               | Large red           | Lens                  | Grey                              | Red-orange                        | Split                   |
| CIPAL1602                | Medium red          | Round lens            | Grey                              | Red-orange                        | Split                   |
| CIPAL1301                | Medium red          | Lens                  | Grey                              | Red-orange                        | Split                   |
| PBA Flash                | Medium red          | Lens                  | Tan                               | Red-orange                        | Split                   |
| CIPAL1522                | Medium red          | Lens                  | Grey                              | Red-orange                        | Split                   |
| PBA Bolt                 | Medium red          | Lens                  | Grey                              | Red-orange                        | Split                   |
| PBA Ace                  | Medium red          | Lens                  | Grey                              | Red-orange                        | Split                   |
| PBA Jumbo                | Large red           | Lens                  | Grey                              | Red-orange                        | Split                   |
| CIPAL1504                | Medium red          | Lens                  | Grey                              | Red-orange                        | Split                   |
| CIPAL1422                | Medium red          | Round lens            | Grey                              | Red-orange                        | Split                   |
| CIPAL1521                | Small red           | Round lens            | Grey                              | Red-orange                        | Split                   |

**Supplementary Table 2a.** Monthly total rainfall and monthly mean maximum temperature during lentil growing season in 2016 at three trial sites.

|                                    | Trial site | May  | Jun  | Jul  | Aug  | Sep   | Oct  | Nov  | Dec  |
|------------------------------------|------------|------|------|------|------|-------|------|------|------|
| <b>Monthly total rainfall - mm</b> | Curyo      | 53.5 | 41.5 | 50.5 | 39.5 | 117.5 | 75.5 | 21.0 | 6.0  |
|                                    | Ouyen      | 48.9 | 39.4 | 31.6 | 35.2 | 131.9 | 47.3 | 26.2 | 5.3  |
|                                    | Rupanyup   | 80.0 | 52.4 | 72.0 | 49.2 | 143.2 | 58.0 | 31.6 | 22.6 |
| <b>Monthly mean Max. Temp.- °C</b> | Curyo      | 19.5 | 14.7 | 14.6 | 16.5 | 17.7  | 21.3 | 26.9 | 30.9 |
|                                    | Ouyen      | 20.3 | 15.4 | 15.5 | 17.6 | 18.7  | 22.7 | 27.7 | 32.3 |
|                                    | Rupanyup   | 18.0 | 13.8 | 13.2 | 15.2 | 16.1  | 18.4 | 24.7 | 29.0 |

Meteorological data were obtained from The Bureau of Meteorology

**Supplementary Table 2b.** Trial site location, indicative soil type and annual and growing season rainfall (April – October; GSR) for 2016 in comparison to long term (at three trial sites where lentils were grown).

| Site            | GPS               | Soil Type           | Rainfall (mm)     |     |                        |     |
|-----------------|-------------------|---------------------|-------------------|-----|------------------------|-----|
|                 |                   |                     | 2016 <sup>1</sup> |     | Long Term <sup>2</sup> |     |
|                 |                   |                     | Annual            | GSR | Annual                 | GSR |
| <b>Ouyen</b>    | 35.07°S; 142.32°E | Loamy sand          | 410               | 335 | 331                    | 213 |
| <b>Curyo</b>    | 35.46°S; 142.46°E | Sandy Loam          | 471               | 356 | 374                    | 266 |
| <b>Rupanyup</b> | 36.32°S; 142.38°E | Black cracking clay | 511               | 384 | 413                    | 284 |

1. Data from on-site weather stations at Curyo and Rupanyup and from Ouyen Bureau of Meteorology station (BOM).
2. Longterm data for Ouyen: Ouyen BOM station (1911-2016); Curyo: Beulah BOM station 1898-2016; Rupanyup: Longrenong BOM station 1860-2016.

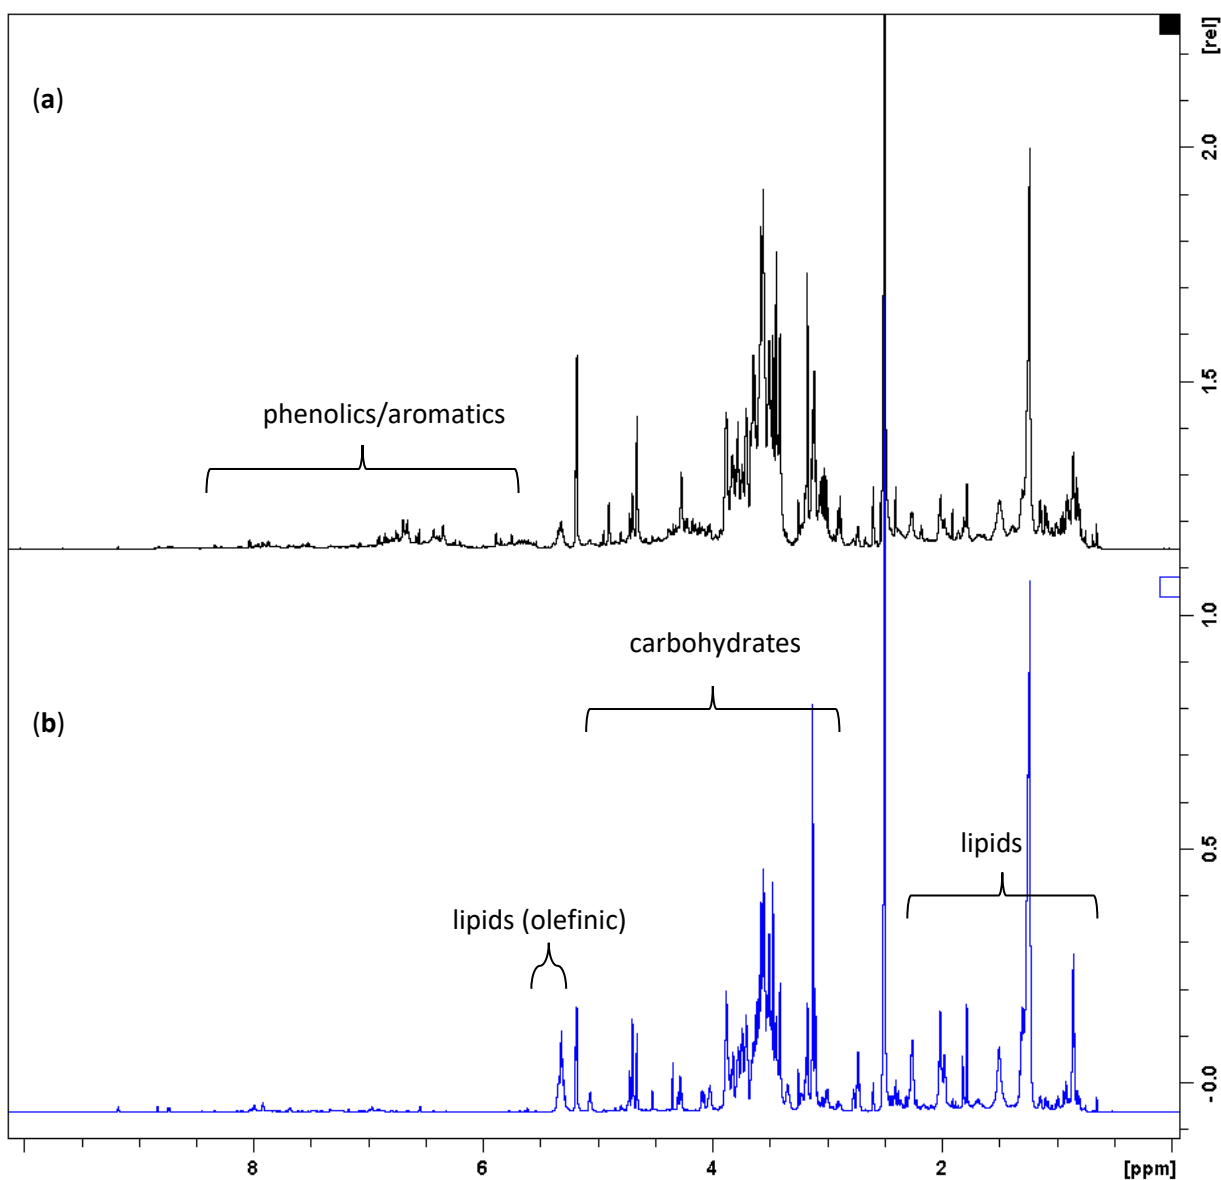

**Supplementary Figure 1.**  $^1\text{H}$  NMR spectra of representative hull and cotyledons (lentil line CIPAL1422 grown at Ouyen) showing resonances associated with the major metabolite classes present: **(a)** spectrum of the lentil hull showing more phenolic resonances; and **(b)** spectrum of the lentil cotyledon showing predominance of lipids and carbohydrates.

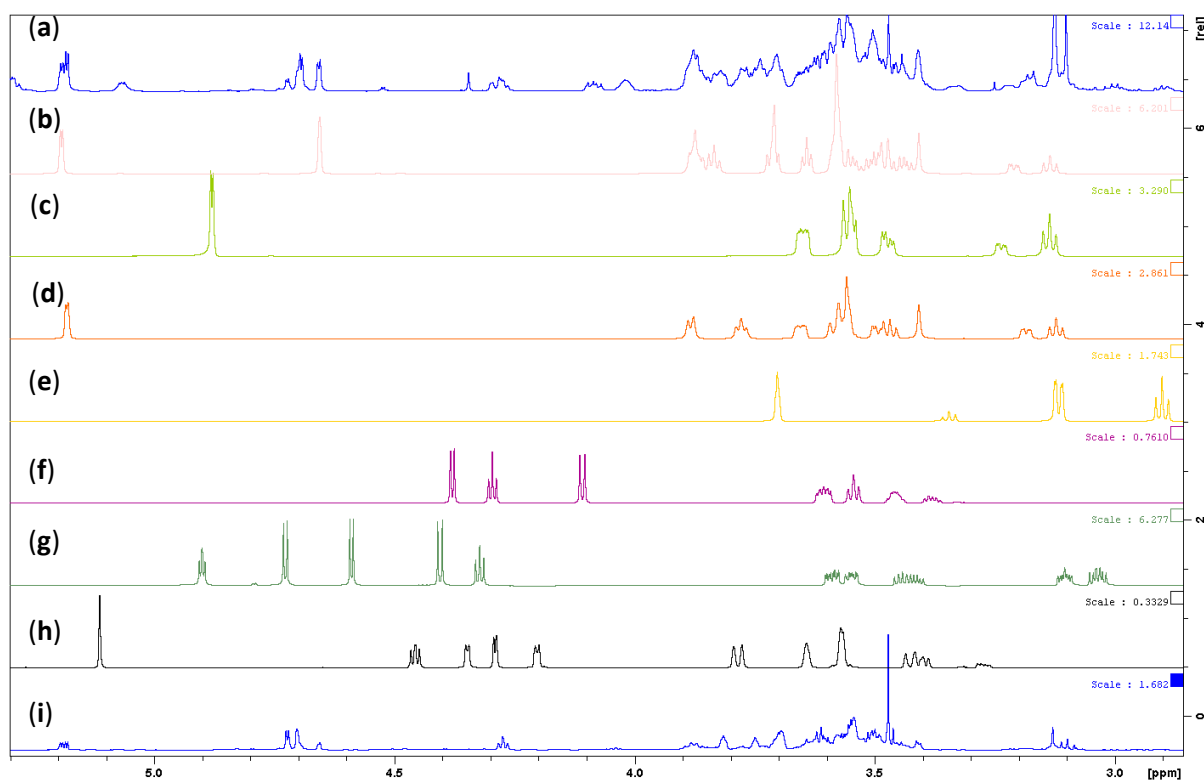

**Supplementary Figure 2.**  $^1\text{H}$  NMR spectra of a representative lentil sample compared to sugar standards: **(a)** cotyledon from PBA Flash (Ouyen), **(b)** raffinose, **(c)** trehalose, **(d)** sucrose, **(e)** inositol, **(f)** mannitol, **(g)**  $\alpha$ -glucose, **(h)** fructose and **(i)** ciceritol (approx. 50% pure).

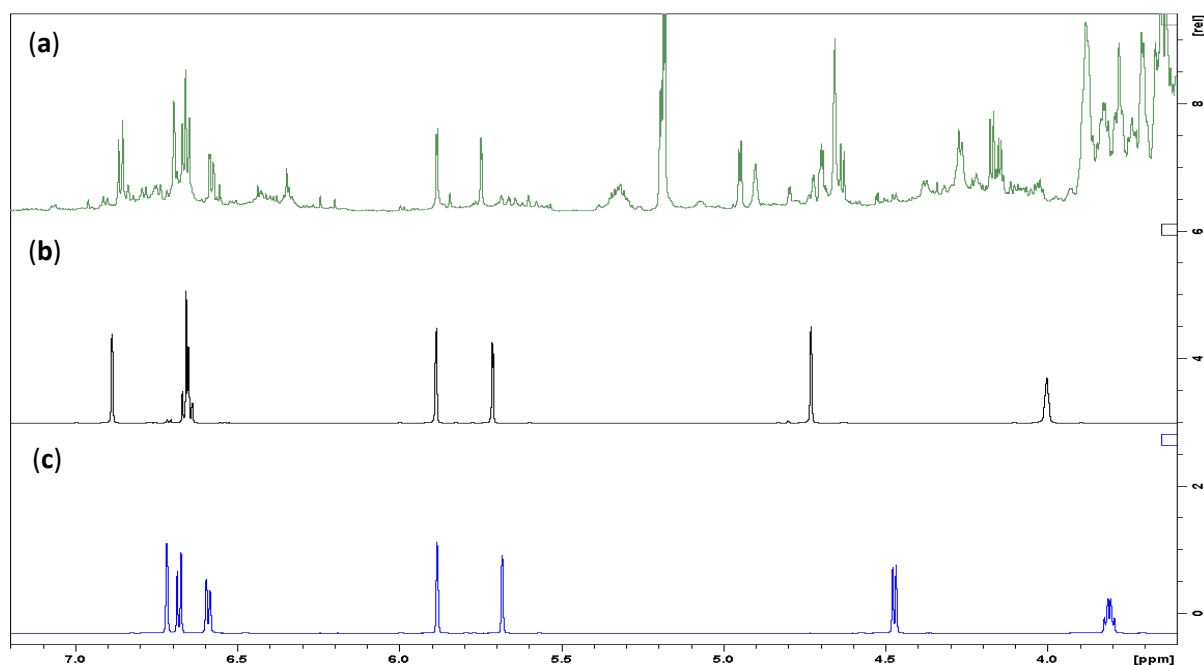

**Supplementary Figure 3.**  $^1\text{H}$  NMR spectra of a representative lentil hull and catechin/epicatechin standards: **(a)** hull from PBA Flash (Ouyen), **(b)** epicatechin and **(c)** catechin.

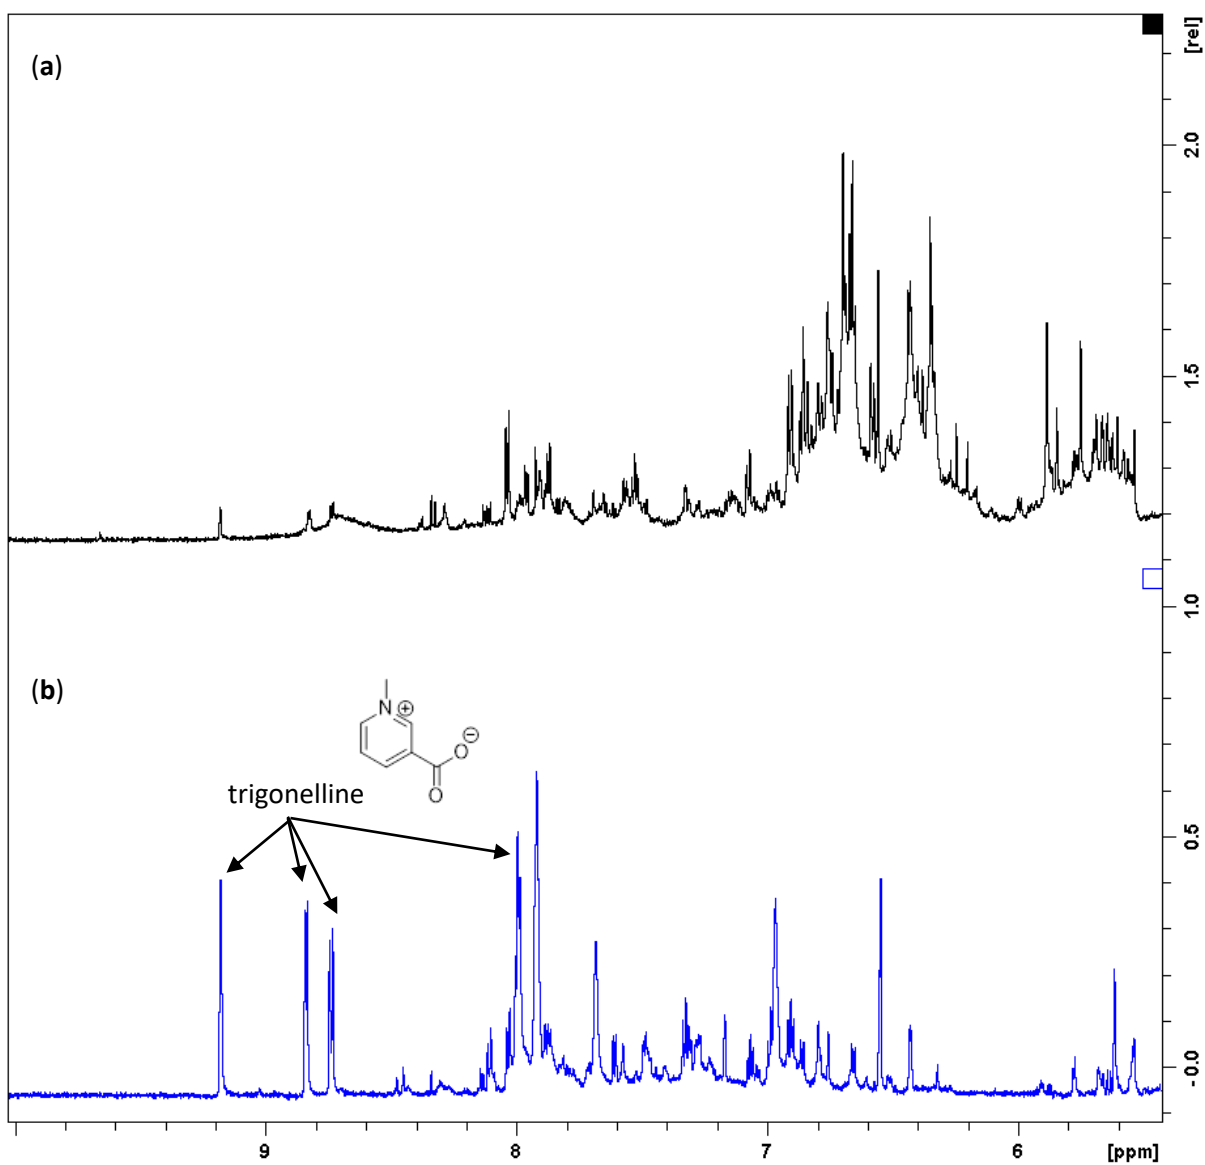

**Supplementary Figure 4.** <sup>1</sup>H NMR spectra of hull and cotyledon for lentil line CIPAL1422 grown at Ouyen showing downfield resonances associated with the major aromatic metabolite classes present: (a) spectrum of the lentil hull showing more phenolic resonances; and (b) spectrum of the lentil cotyledon showing predominance of the alkaloid trigonelline.

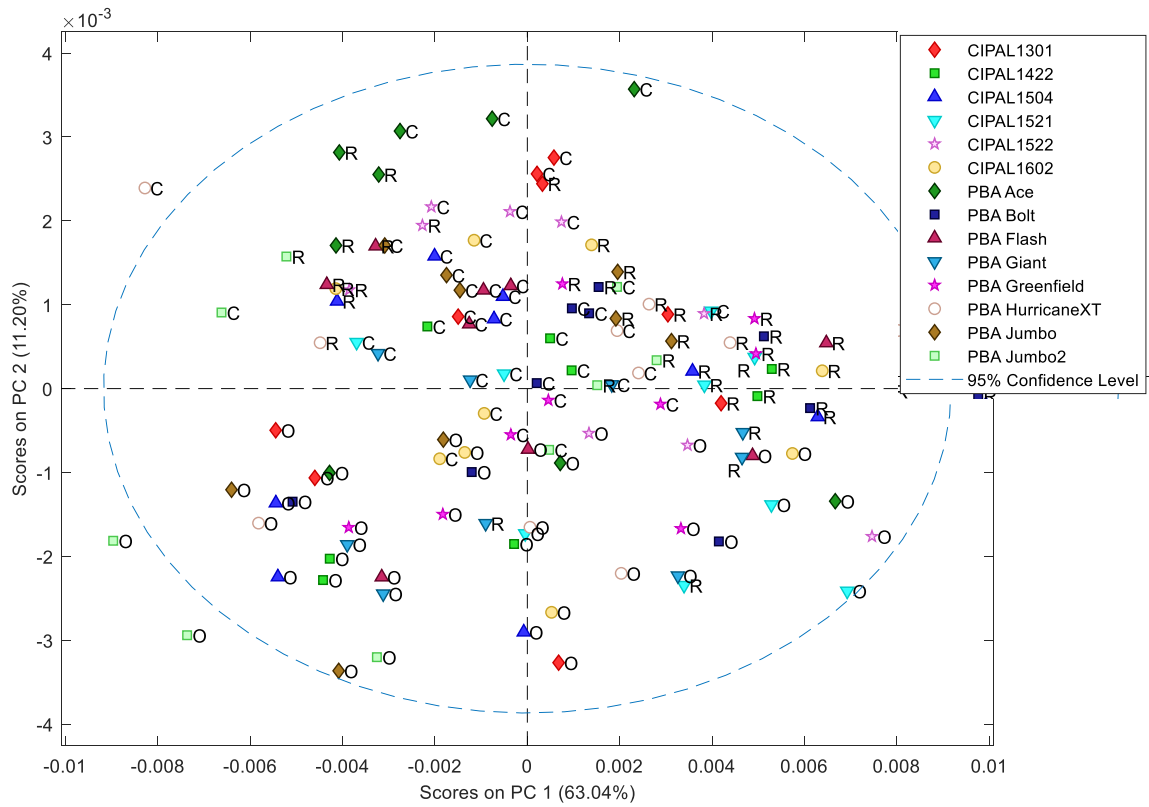

**Supplementary Figure 5.** PCA scores plot for cotyledon data coloured by genotype with site indicated by letter: O=Ouyen, C=Curyo and R=Rupanyup. Ouyen grown CIPAL 1522 lentils (+ve PC1) have more lipid and less carbohydrates than the PBA Jumbo2 (-ve PC1), refer to loadings plots in main text (Figure 3 b).

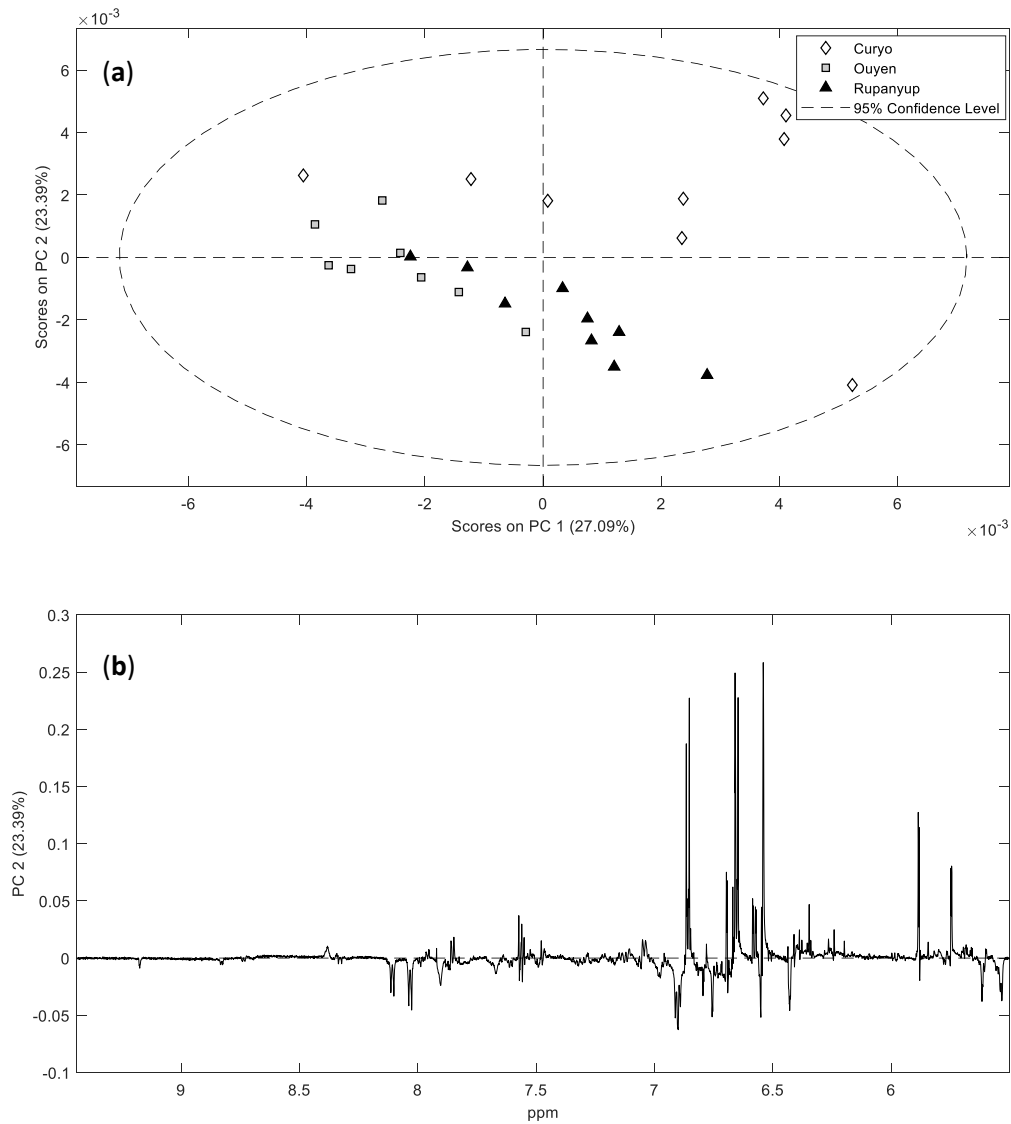

**Supplementary Figure 6.** PCA scores and loadings plot for the phenolic region of hull data for PBA Giant, PBA Flash and PBA Greenfield a: **(a)** scores plot showing Curyo separates from the other sites on PC2; and **(b)** loadings plot for PC2 demonstrating elevation in catechin/epicatechin derivatives.

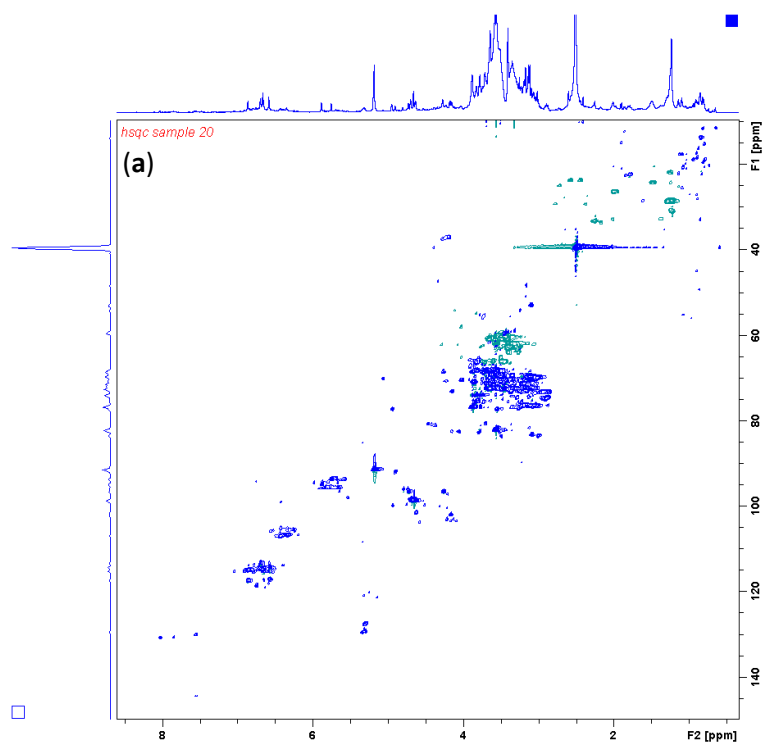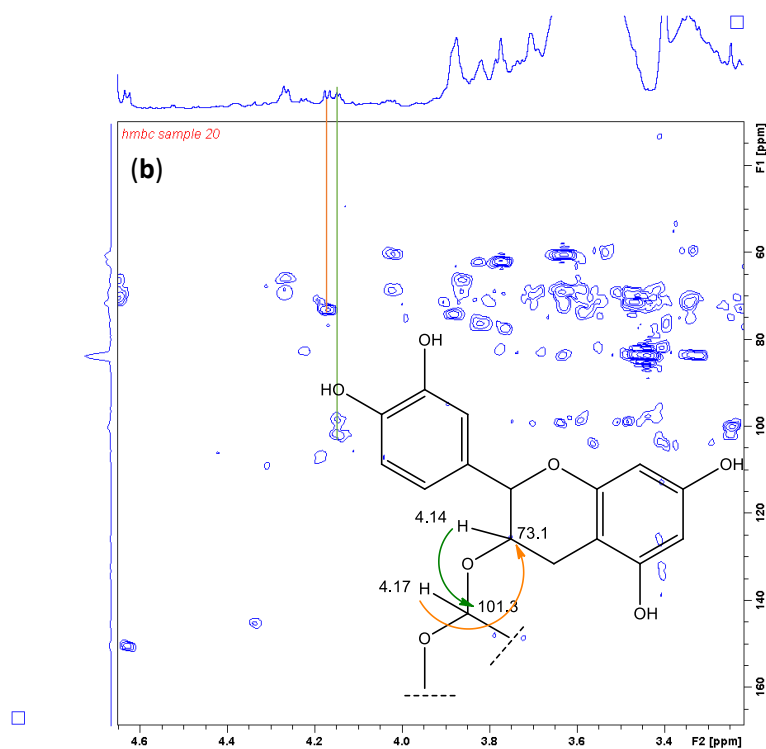

**Supplementary Figure 7.** 2D NMR data for a representative lentil sample: (a) gHSQC data for a hull sample. (b) gHMBC data for catechin/epicatechin highlighting correlation between an anomeric proton and the flavanol-3-ol carbon.



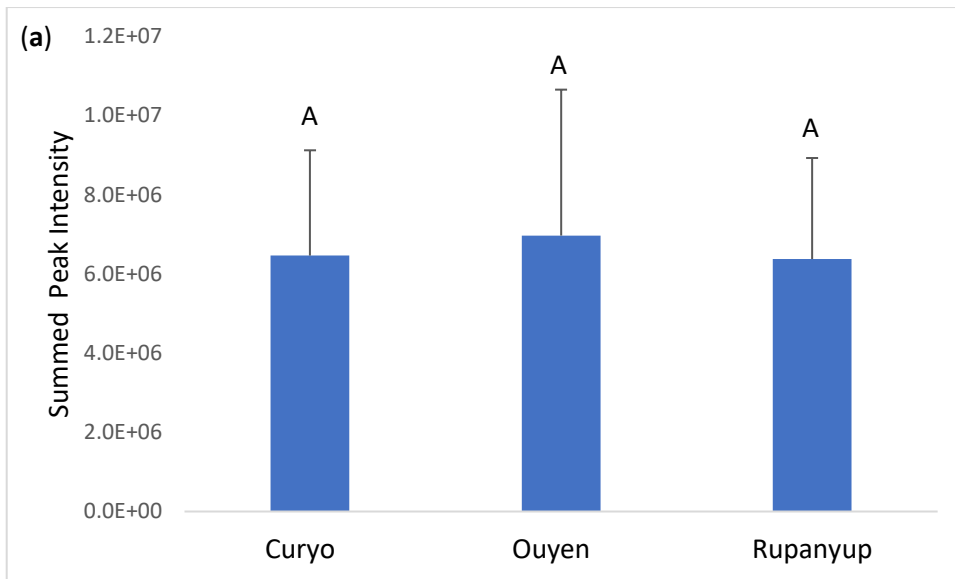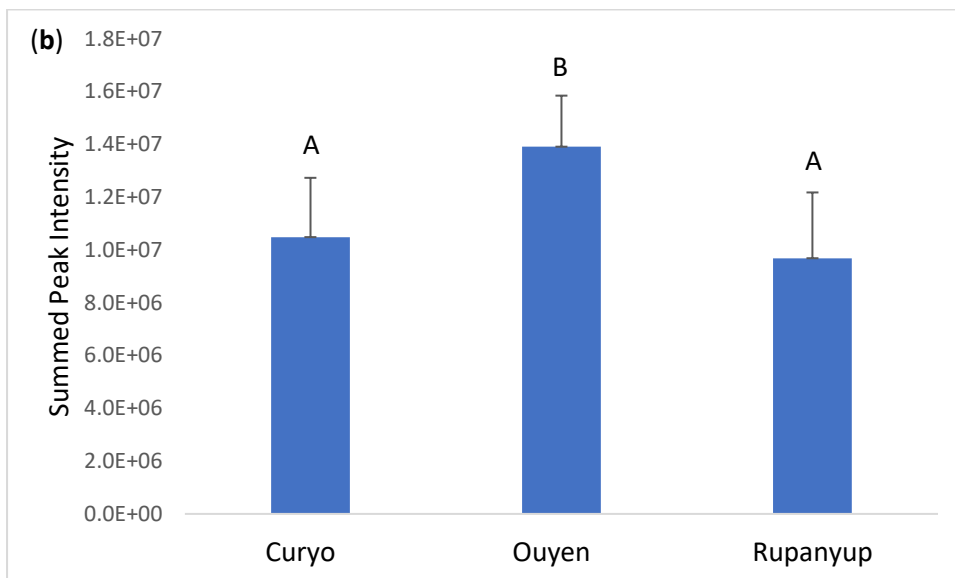

**Supplementary Figure 8.** Relative catechin content and standard deviation (error bars) in the lentil hulls by site: **(a)** all genotypes and all replicates, and **(b)** PBA Flash, PBA Giant and PBA Greenfield only. Different letters indicate significance at  $p=0.05$  (Student's *t*-test).

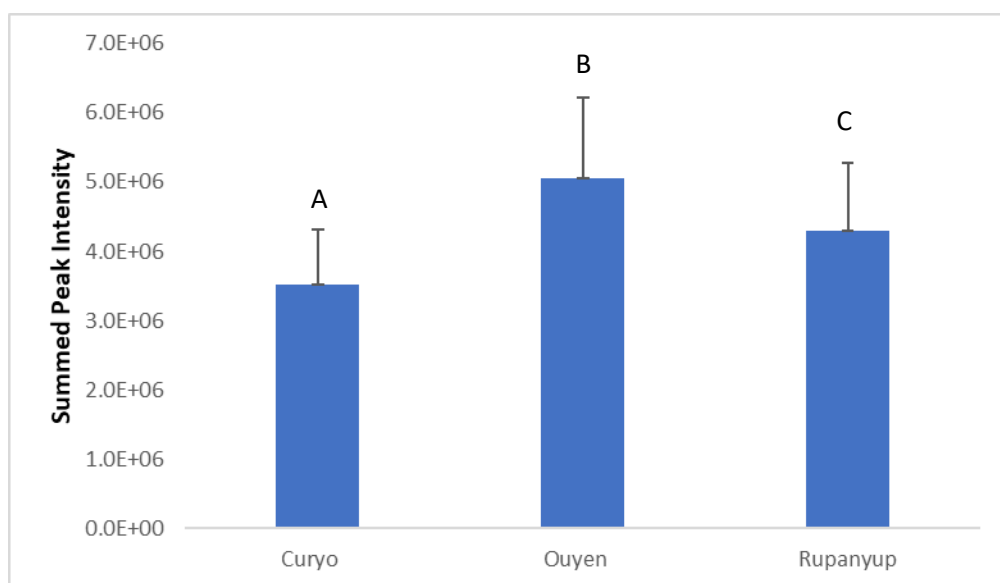

**Supplementary Figure 9.** Relative kaempferol content and standard deviation (error bars) in the lentil hulls by location (includes all samples). Different letters indicate significance at  $p=0.05$  (Student's  $t$ -test).

**Supplementary Tables 3 a-i.** NMR data for standards, assigned by  $^1\text{H}$  NMR (noesypr1d), 2D NMR (cosygpqf, hsqcedetgisp2.2 and hmbcgp12ndqf) and references where noted.

**Supplementary Table 3a.** NMR data for fructose (DMSO- $d_6$ , 700MHz)

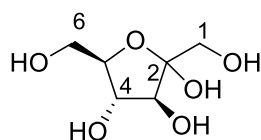

| No    | $^1\text{H}$ $\delta$ (m, J Hz)          | $^{13}\text{C}$ (ppm, m) |
|-------|------------------------------------------|--------------------------|
| C1    | 3.40 (br d, 11.)<br>3.27 (dd, 5.5, 11.0) | 64.2                     |
| C2    | -                                        | 98.0                     |
| C3    | 3.64                                     | 68.9                     |
| C4    | 3.57 (br m)                              | 69.6                     |
| C5    | 3.57 (br m)                              | 67.6                     |
| C6    | 3.78 (br d, 12.8)<br>3.42 (br d, 12.8)   | 62.8                     |
| C1-OH | 4.48 (dd, 5.5)                           | -                        |
| C2-OH | 5.11 (s)                                 | -                        |
| C3-OH | 4.20 (br d, 5.7)                         | -                        |
| C4-OH | 4.35 (br d 5,2)                          | -                        |
| C6-OH | 4.29 (br d 5.2)                          | -                        |

**Supplementary Table 3b.** NMR data for  $\alpha$ -glucose (DMSO-d<sub>6</sub>, 700MHz)

Ref: Gillet et al, Mag Res Chem. **1981** 17 (1) 28-36.

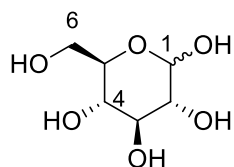

| No    | <sup>1</sup> H $\delta$ (m, J Hz)         | <sup>13</sup> C (ppm, m) |
|-------|-------------------------------------------|--------------------------|
| C1    | 4.90 (br t, 4.2)                          | 91.9                     |
| C2    | 3.10 (ddd, 6.7, 3.6, 0.6)                 | 72.8                     |
| C3    | 3.41 (br m)                               | 73.4                     |
| C4    | 3.03 (m)                                  | 70.9                     |
| C5    | 3.55 (br m)                               | 72.4                     |
| C6    | 3.44 (br m)<br>3.59 (ddd, 11.5, 5.5, 2.3) | 61.6                     |
| C1-OH | 6.17 (dd, 4.2, 0.6)                       | -                        |
| C2-OH | 4.40 (d, 6.7)                             | -                        |
| C3-OH | 4.59 (br d, 4.7)                          | -                        |
| C4-OH | 4.73 (br d 5.3)                           | -                        |
| C6-OH | 4.32 (br t 5.8)                           | -                        |

**Supplementary Table 3c.** NMR data for sucrose (DMSO-d<sub>6</sub>, 700MHz)

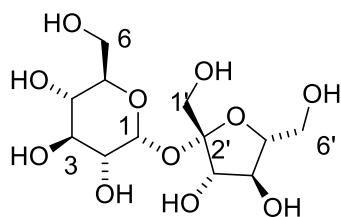

| No  | <sup>1</sup> H $\delta$ (m, J Hz) | <sup>13</sup> C (ppm, m) |
|-----|-----------------------------------|--------------------------|
| C1  | 5.18 (br d, 3.3)                  | 91.4                     |
| C2  | 3.18 (br dd, 9.6, 3.6)            | 71.4                     |
| C3  | 3.13 (br t, 9.1)                  | 69.5                     |
| C4  | 3.65 (br d 7.6)                   | 72.5                     |
| C5  | 3.47 (br m)                       | 72.5                     |
| C6  | 3.50 (br m)<br>3.58 (br m)        | 60.2                     |
| C1' | 3.41 (br s)<br>3.56 (br m)        | 61.8                     |
| C2' | -                                 | 102.5                    |
| C3' | 3.88 (br d, 7.4)                  | 76.7                     |
| C4' | 3.78 (br t, 7.4)                  | 74.0                     |
| C5' | 3.57 (br m)                       | 82.2                     |
| C6' | 3.50 (br m)<br>3.58 (br m)        | 60.2                     |

**Supplementary Table 3d.** NMR data for manitol (DMSO-d<sub>6</sub>, 700MHz)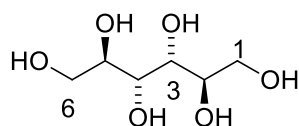

| No     | <sup>1</sup> H δ (m, J Hz) | <sup>13</sup> C (ppm, m) |
|--------|----------------------------|--------------------------|
| C1, C6 | 3.38 (br m)<br>3.61(br m)  | 63.5                     |
| C2, C5 | 3.56 (br m)                | 71.1                     |
| C3, C4 | 3.54 (br t, 7.8)           | 69.5                     |

**Supplementary Table 3e.** NMR data for inositol (DMSO-d<sub>6</sub>, 700MHz)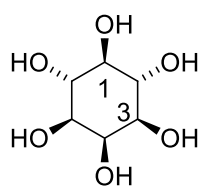

| No     | <sup>1</sup> H δ (m, J Hz) | <sup>13</sup> C (ppm, m) |
|--------|----------------------------|--------------------------|
| C1     | 2.90 (t, 9.1)              | 74.9                     |
| C2, C6 | 3.34 (t, 9.1)              | 72.4                     |
| C3, C5 | 3.12 (br dd, 9.1, 2.5)     | 71.6                     |
| C4     | 3.70 (br s)                | 72.3                     |

**Supplementary Table 3f.** NMR data for trehalose (DMSO-d<sub>6</sub>, 700MHz)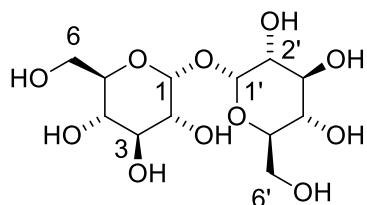

| No     | <sup>1</sup> H δ (m, J Hz)          | <sup>13</sup> C (ppm, m) |
|--------|-------------------------------------|--------------------------|
| C1/C1' | 4.89 (d, 3.4)                       | 93.5                     |
| C2/C2' | 3.24 (dd, 9.5, 3.4)                 | 71.1                     |
| C3/C3' | 3.56 (t, 9.5)                       | 73.3                     |
| C4/C4' | 3.14 (br d, 7.6)                    | 70.5                     |
| C5/C5' | 3.65 (br m)                         | 72.9                     |
| C6/C6' | 3.48 (dd, 11.7, 4.9)<br>3.56 (br m) | 61.2                     |

**Supplementary Table 3g.** NMR data for raffinose (DMSO-d<sub>6</sub>, 700MHz)

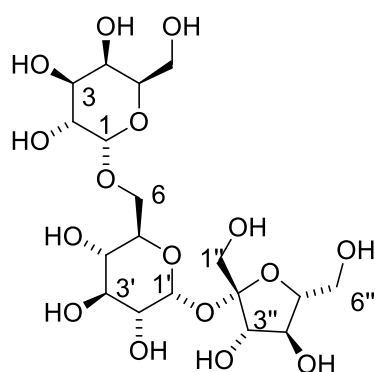

| No   | <sup>1</sup> H δ (m, J Hz) | <sup>13</sup> C (ppm, m) |
|------|----------------------------|--------------------------|
| C1   | 4.65 (br s)                | 98.8                     |
| C2   | 3.63 (br t, 6.2)           | 70.7                     |
| C3   | 3.83 (br t, 7.7)           | 74.0                     |
| C4   | 3.63 (br t, 6.2)           | 70.7                     |
| C5   | 3.47 (br m)                | 72.6                     |
| C1'' | 3.41 (br s)<br>3.57 (br m) | 61.8                     |
| C1'  | 5.18 (br d, 3.5)           | 91.4                     |
| C2'  | 3.21 (br dd, 9.3, 3.5)     | 71.3                     |
| C3'  | 3.14 (br t, 9.3)           | 70.0                     |
| C4'  | 3.87 (br m)                | 71.0                     |
| C5'  | 3.47 (br m)                | 72.6                     |
| C6'  | 3.47 (br m)<br>3.71 (br m) | 66.3                     |
| C1'' | 3.41 (br s)<br>3.56 (br m) | 61.8                     |
| C2'' | -                          | 103.9                    |
| C3'' | 3.88 (br m)                | 76.8                     |
| C4'' | 3.83 (br t, 7.7)           | 74.0                     |
| C5'' | 3.58 (br m)                | 82.2                     |
| C6'' | 3.44 (br m)<br>3.50 (br m) | 60.3                     |

**Supplementary Table 3h.** NMR data for ciceritol (DMSO-d<sub>6</sub>, 700MHz)

Ref: Bernabé M et al, J. Agric. Food Chem. 1993, 42, 870-872

Complete assignment of ciceritol in our hands was not possible since the compounds was not pure and there were many overlapping resonances corresponding to oxymethines (67.0-77.7 ppm, 3.50 - 4.00).

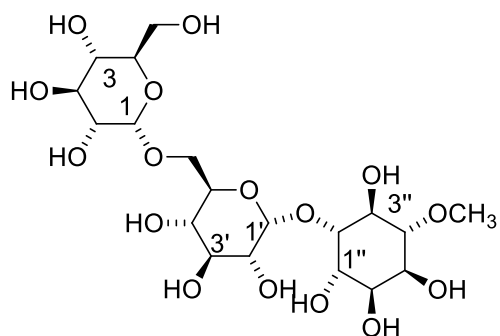

| No                   | <sup>1</sup> H δ (m, J Hz) | <sup>13</sup> C (ppm, m) |
|----------------------|----------------------------|--------------------------|
| C1                   | 4.63 (br s)                | 98.8                     |
| C2                   | 3.59 (m)                   | 69.2                     |
| C6                   | 3.41 (m)<br>3.60 (m)       | 61.9                     |
| C1'                  | 5.18 (d,3.9)               | 91.3                     |
| C6'                  | 3.50 (m)<br>3.61 (m)       | 66.0                     |
| C4''                 | 3.10 (br t, 9.4)           | 82.3                     |
| C5''                 | 3.54 (br m)                | 70.3                     |
| C4''OCH <sub>3</sub> | 3.47 (s)                   | 59.7                     |

**Supplementary Table 3i.** NMR data for catechin (DMSO-d<sub>6</sub>, 700MHz)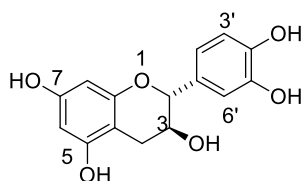

| No  | <sup>1</sup> H δ (m, J Hz)                 | <sup>13</sup> C (ppm, m) |
|-----|--------------------------------------------|--------------------------|
| C2  | 4.47 (d, 7.5)                              | 80.7                     |
| C3  | 3.81 (br dd, 8.0, 5.4)                     | 66.0                     |
| C4  | 2.35 (dd 16.0, 8.2)<br>2.65 (dd 16.0, 5.4) | 27.6                     |
| C4a | -                                          | 99.0                     |
| C5  | -                                          | 155.8                    |
| C6  | 5.88 (br d 1.9)                            | 94.8                     |
| C7  | -                                          | 156.5                    |
| C8  | 5.68 (br d 1.9)                            | 93.5                     |
| C8a | -                                          | 155.2                    |
| C1' | -                                          | 130.7                    |
| C2' | 6.59 (br dd, 8.0, 1.3)                     | 118.1                    |
| C3' | 6.70 (d, 8.0)                              | 114.7                    |
| C4' | -                                          | 144.8                    |
| C5' | -                                          | 144.8                    |
| C6' | 6.72 (br s)                                | 114.2                    |

**Supplementary Table 3i.** NMR data for epi-catechin (DMSO-d<sub>6</sub>, 700MHz)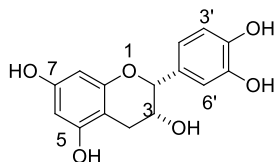

| No  | <sup>1</sup> H δ (m, J Hz)                 | <sup>13</sup> C (ppm, m) |
|-----|--------------------------------------------|--------------------------|
| C2  | 4.73 (br s)                                | 77.7                     |
| C3  | 4.00 (br m)                                | 64.6                     |
| C4  | 2.47 (dd 16.4, 3.4)<br>2.68 (dd 16.4, 4.5) | 27.9                     |
| C4a | -                                          | 98.3                     |
| C5  | -                                          | 155.5                    |
| C6  | 5.88 (br d 2.0)                            | 94.8                     |
| C7  | -                                          | 156.2                    |
| C8  | 5.71 (br d 2.0)                            | 93.5                     |
| C8a | -                                          | 155.6                    |
| C1' | -                                          | 130.4                    |
| C2' | 6.66 (m)                                   | 117.6                    |
| C3' | 6.65 (m)                                   | 114.4                    |
| C4' | -                                          | 144.3                    |
| C5' | -                                          |                          |
| C6' | 6.89 (br s)                                | 114.6                    |
